# Supplementary material
Source: PubMed Central journal article supplement (PMC4911899)

**Supplementary Figure 1.** Emergency department visits involving Schedule II opioid analgesic use in 11 metropolitan areas, grouped by year of prescription drug monitoring program implementation

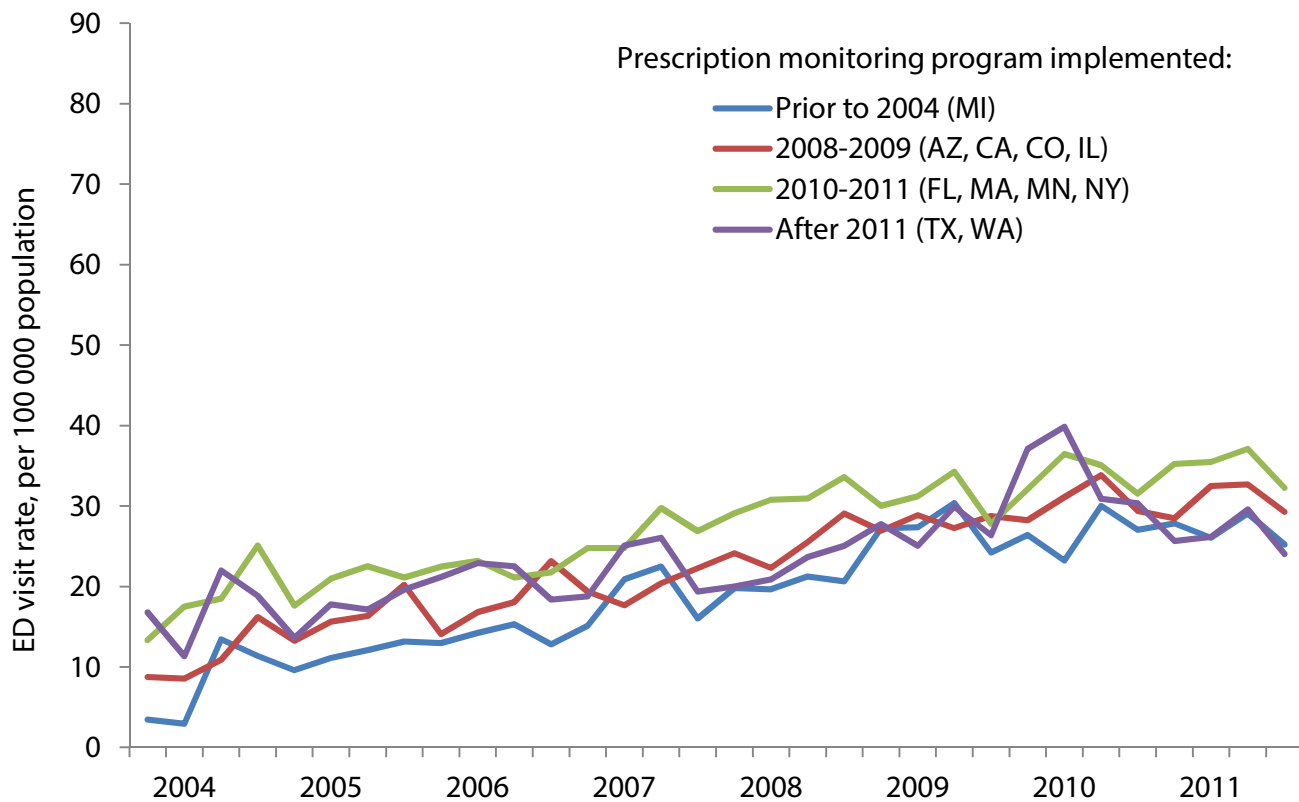

Supplement: NIHMS792691-supplement-Supplementary_Figure_1.pdf [file NIHMS792691-supplement-Supplementary_Figure_1.pdf]
