# Supplementary material
Source: PubMed Central journal article supplement (PMC4911899)
Supplement: NIHMS792691-supplement-Supplementary_Figure_3.pdf [file NIHMS792691-supplement-Supplementary_Figure_3.pdf]

**Supplementary Figure 3.** Emergency department visits involving Schedule II opioid analgesic use and misuse, centered on date of prescription drug monitoring program implementation<sup>a</sup>

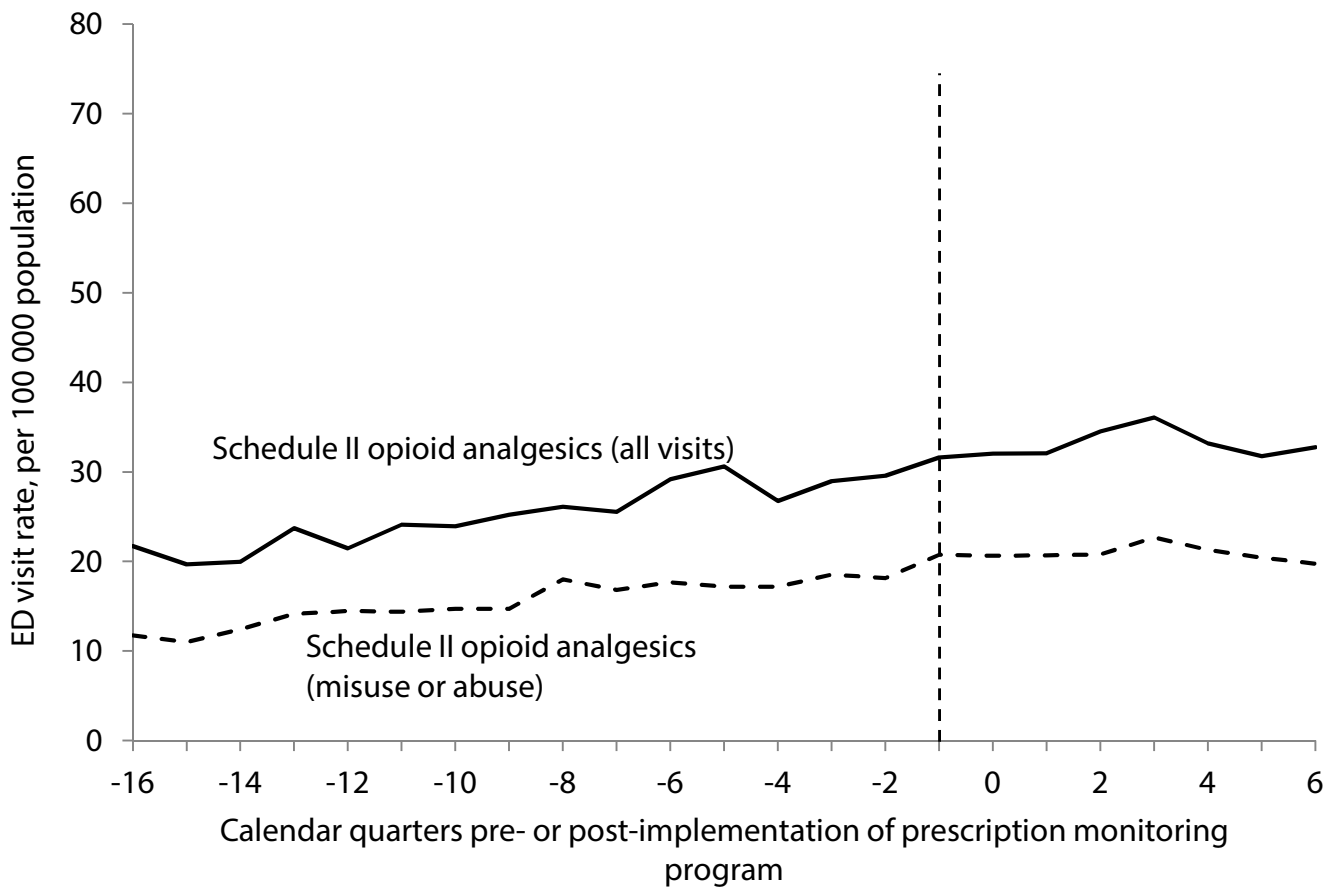

<sup>a</sup>Figure includes only metropolitan areas with data pre- and post-implementation: Boston, New York City, Chicago, Minneapolis, Denver, Phoenix, and San Francisco
